# Supplementary material
Source: PubMed Central journal article supplement (PMC2629116)
Supplement: M806434200_1.pdf [file M806434200_1.pdf]

**Supplemental Table S1. Complete list of gene transcripts that are significantly up or down regulated upon PRC silencing in U2OS cells by both shRNAs #1 and #4 relative to a control shRNA.**

| Gene ID | Gene Symbol | Gene Description                                                           | PRC shRNA #1 fold change <sup>a</sup> | PRC shRNA#1 p-value <sup>b</sup> | PRC shRNA#1 FDR p-value <sup>c</sup> | PRC shRNA #4 fold change <sup>d</sup> | PRC shRNA#4 p-value <sup>e</sup> | PRC shRNA#4 FDR p-value <sup>f</sup> |
|---------|-------------|----------------------------------------------------------------------------|---------------------------------------|----------------------------------|--------------------------------------|---------------------------------------|----------------------------------|--------------------------------------|
| 8337    | HIST2H2AA3  | Histone cluster 2, H2aa3                                                   | -45.58                                | 5.02E-10                         | 2.87E-06                             | -2.88                                 | 2.90E-07                         | 3.47E-04                             |
| 8365    | HIST1H4H    | Histone cluster 1, H4h                                                     | -45.53                                | 5.83E-11                         | 8.79E-07                             | -3.92                                 | 9.96E-08                         | 1.79E-04                             |
| 8334    | HIST1H2AC   | Histone cluster 1, H2ac                                                    | -26.11                                | 1.25E-09                         | 3.46E-06                             | -3.21                                 | 2.96E-06                         | 8.86E-04                             |
| 8349    | HIST2H2BE   | Histone cluster 2, H2be                                                    | -18.95                                | 5.32E-08                         | 2.36E-05                             | -3.15                                 | 3.24E-05                         | 2.94E-03                             |
| 3006    | HIST1H1C    | histone cluster 1, H1c                                                     | -15.45                                | 8.33E-09                         | 1.07E-05                             | -1.87                                 | 2.28E-05                         | 2.54E-03                             |
| 8970    | HIST1H2BJ   | Histone cluster 1, H2bj                                                    | -14.28                                | 2.57E-09                         | 5.53E-06                             | -3.35                                 | 1.90E-06                         | 8.35E-04                             |
|         |             |                                                                            | (-2.86) <sup>g</sup>                  | (6.63E-07)                       |                                      | (-2.11)                               | (2.44E-05)                       |                                      |
| 8338    | HIST2H2AC   | Histone cluster 2, H2ac                                                    | -11.46                                | 1.69E-08                         | 1.21E-05                             | -2.37                                 | 4.32E-06                         | 1.01E-03                             |
| 3017    | HIST1H2BD   | histone cluster 1, H2bd                                                    | -9.90                                 | 9.20E-09                         | 1.07E-05                             | -1.65                                 | 4.29E-04                         | 1.15E-02                             |
| 8344    | HIST1H2BE   | Histone cluster 1, H2be                                                    | -8.63                                 | 1.58E-07                         | 4.87E-05                             | -2.17                                 | 3.62E-05                         | 3.03E-03                             |
| 8347    | HIST1H2BC   | Histone cluster 1, H2bc                                                    | -8.12                                 | 2.83E-07                         | 6.65E-05                             | -2.25                                 | 7.70E-06                         | 1.37E-03                             |
| 55766   | H2AFJ       | H2A histone family, member J                                               | -7.67                                 | 1.29E-07                         | 4.14E-05                             | -2.37                                 | 3.71E-06                         | 9.01E-04                             |
| 5118    | PCOLCE      | procollagen C-endopeptidase enhancer                                       | -6.35                                 | 1.03E-06                         | 1.68E-04                             | -1.71                                 | 2.89E-03                         | 3.42E-02                             |
| 7045    | TGFBI       | transforming growth factor, beta-induced, 68kDa                            | -6.25                                 | 2.73E-06                         | 3.07E-04                             | -3.09                                 | 5.82E-05                         | 3.92E-03                             |
|         |             |                                                                            | (-7.12)                               | (9.00E-03)                       |                                      | (-3.06)                               | (2.28E-02)                       |                                      |
| 8367    | HIST1H4E    | Histone cluster 1, H4e                                                     | -5.79                                 | 1.07E-08                         | 1.12E-05                             | -2.38                                 | 8.76E-07                         | 5.42E-04                             |
| 2791    | GNG11       | guanine nucleotide binding protein (G protein), gamma 11                   | -5.01                                 | 3.51E-06                         | 3.48E-04                             | 1.53                                  | 2.73E-06                         | 8.86E-04                             |
| 5653    | KLK6        | kallikrein-related peptidase 6                                             | -4.73                                 | 1.14E-05                         | 5.76E-04                             | 2.42                                  | 3.56E-04                         | 1.05E-02                             |
| 1140    | CHRNB1      | cholinergic receptor, nicotinic, beta 1 (muscle)                           | -4.70                                 | 2.06E-07                         | 5.74E-05                             | -1.67                                 | 3.95E-05                         | 3.22E-03                             |
| 8351    | HIST1H3D    | histone cluster 1, H3d                                                     | -4.40                                 | 9.51E-07                         | 1.62E-04                             | -1.86                                 | 5.36E-07                         | 4.37E-04                             |
| 9945    | GFPT2       | Glutamine-fructose-6-phosphate transaminase 2                              | -4.19                                 | 1.88E-06                         | 2.47E-04                             | -2.15                                 | 1.33E-05                         | 1.90E-03                             |
| 11055   | ZBPB        | Zona pellucida binding protein                                             | -4.14                                 | 1.11E-08                         | 1.12E-05                             | -2.18                                 | 7.38E-08                         | 1.57E-04                             |
| 4248    | MGAT3       | Mannosyl (beta-1,4-)-glycoprotein beta-1,4-N-acetylglucosaminyltransferase | -3.34                                 | 5.66E-05                         | 1.42E-03                             | -2.05                                 | 6.05E-06                         | 1.57E-04                             |
| 9984    | THOC1       | THO complex 1                                                              | -3.18                                 | 5.48E-08                         | 2.36E-05                             | -1.57                                 | 3.85E-04                         | 1.08E-02                             |
| 8764    | TNFRSF14    | tumor necrosis factor receptor superfamily,                                | -3.11                                 | 2.63E-03                         | 3.46E-03                             | -1.76                                 | 2.48E-03                         | 3.13E-02                             |

| Gene ID | Gene Symbol | Gene Description                                                        | PRC shRNA #1 fold change <sup>a</sup> | PRC shRNA#1 p-value <sup>b</sup> | PRC shRNA#1 FDR p-value <sup>c</sup> | PRC shRNA #4 fold change <sup>d</sup> | PRC shRNA#4 p-value <sup>e</sup> | PRC shRNA#4 FDR p-value <sup>f</sup> |
|---------|-------------|-------------------------------------------------------------------------|---------------------------------------|----------------------------------|--------------------------------------|---------------------------------------|----------------------------------|--------------------------------------|
|         |             | member 14 (herpesvirus entry mediator)                                  |                                       |                                  |                                      |                                       |                                  |                                      |
| 5521    | PPP2R2B     | Protein phosphatase 2 (formerly 2A), regulatory subunit B, beta isoform | -3.06<br>(-4.44)                      | 6.52E-03<br>(8.95E-04)           | 3.02E-02                             | -2.06<br>(-4.07)                      | 3.37E-06<br>(5.89E-04)           | 8.86E-04                             |
| 79822   | ARHGAP28    | Rho GTPase activating protein 28                                        | -3.06                                 | 1.87E-03                         | 1.26E-02                             | -1.51                                 | 4.58E-04                         | 1.19E-02                             |
| 968     | CD68        | CD68 molecule                                                           | -2.84                                 | 5.48E-04                         | 5.65E-03                             | -1.52                                 | 1.10E-03                         | 1.96E-02                             |
| 2192    | FBLN1       | fibulin 1                                                               | -2.75                                 | 1.22E-04                         | 2.14E-03                             | -1.80                                 | 4.30E-04                         | 1.15E-02                             |
| 58191   | CXCL16      | chemokine (C-X-C motif) ligand 16                                       | -2.72                                 | 1.70E-06                         | 2.37E-04                             | -1.59                                 | 4.98E-06                         | 1.05E-03                             |
| 8357    | HIST1H3H    | histone cluster 1, H3h                                                  | -2.68                                 | 3.56E-06                         | 3.51E-04                             | -1.73                                 | 8.36E-05                         | 4.75E-03                             |
| 6578    | SLCO2A1     | Solute carrier organic anion transporter family, member 2A1             | -2.65                                 | 1.81E-03                         | 1.24E-02                             | -2.83                                 | 9.32E-09                         | 8.36E-05                             |
| 5243    | ABCB1       | ATP-binding cassette, sub-family B (MDR/TAP), member 1                  | -2.58                                 | 8.93E-06                         | 5.17E-04                             | -1.71                                 | 8.78E-06                         | 1.49E-03                             |
| 11211   | FZD10       | frizzled homolog 10 (Drosophila)                                        | -2.56                                 | 2.86E-05                         | 9.18E-04                             | -1.51                                 | 6.31E-06                         | 1.18E-03                             |
| 120     | ADD3        | adducin 3 (gamma)                                                       | -2.55                                 | 1.81E-05                         | 7.34E-04                             | -1.78                                 | 9.23E-05                         | 4.99E-03                             |
| 7781    | SLC30A3     | solute carrier family 30 (zinc transporter), member 3                   | -2.39                                 | 1.57E-05                         | 6.75E-04                             | -1.52                                 | 1.28E-04                         | 5.99E-03                             |
| 5266    | PI3         | peptidase inhibitor 3, skin-derived (SKALP)                             | -2.38                                 | 2.45E-03                         | 1.52E-02                             | -1.66                                 | 1.18E-04                         | 5.73E-03                             |
| 26277   | TINF2       | TERF1 (TRF1)-interacting nuclear factor 2                               | -2.32                                 | 2.26E-03                         | 1.44E-02                             | -1.50                                 | 6.13E-04                         | 1.40E-02                             |
| 23416   | KCNH3       | potassium voltage-gated channel, subfamily H (eag-related), member 3    | -2.26                                 | 1.98E-05                         | 7.65E-04                             | 1.52                                  | 1.41E-04                         | 6.34E-03                             |
| 3394    | IRF8        | interferon regulatory factor 8                                          | -2.21                                 | 3.50E-06                         | 3.48E-04                             | -1.81                                 | 8.85E-06                         | 1.49E-03                             |
| 401472  | FLJ45248    | FLJ45248 protein                                                        | -2.20                                 | 7.92E-03                         | 3.49E-02                             | -1.91                                 | 1.10E-04                         | 5.49E-03                             |
| 3490    | IGFBP7      | insulin-like growth factor binding protein 7                            | -2.17                                 | 7.10E-04                         | 6.63E-03                             | 2.42                                  | 8.33E-04                         | 1.66E-02                             |
| 284217  | LAMA1       | laminin, alpha 1                                                        | -2.17                                 | 2.16E-04                         | 3.11E-03                             | -1.56                                 | 9.08E-05                         | 4.98E-03                             |
| 3689    | ITGB2       | integrin, beta 2 (complement component 3 receptor 3 and 4 subunit)      | -2.15                                 | 3.50E-06                         | 3.48E-04                             | -1.58                                 | 7.64E-06                         | 1.37E-03                             |
| 4747    | NEFL        | neurofilament, light polypeptide 68kDa                                  | -2.14                                 | 7.11E-05                         | 1.58E-03                             | -2.06                                 | 4.07E-04                         | 1.12E-02                             |
| 84767   | SPRYD5      | SPRY domain containing 5                                                | -2.13                                 | 1.09E-05                         | 5.65E-04                             | -1.61                                 | 4.71E-05                         | 3.48E-03                             |
| 8774    | NAPG        | N-ethylmaleimide-sensitive factor attachment protein, gamma             | -2.12                                 | 5.80E-06                         | 4.23E-04                             | -1.82                                 | 2.24E-04                         | 8.08E-03                             |
| 2948    | GSTM4       | glutathione S-transferase M4                                            | -2.07                                 | 8.41E-05                         | 1.74E-03                             | 1.66                                  | 7.22E-04                         | 1.55E-02                             |

| Gene ID | Gene Symbol | Gene Description                                           | PRC shRNA #1 fold change <sup>a</sup> | PRC shRNA#1 p-value <sup>b</sup> | PRC shRNA#1 FDR p-value <sup>c</sup> | PRC shRNA #4 fold change <sup>d</sup> | PRC shRNA#4 p-value <sup>e</sup> | PRC shRNA#4 FDR p-value <sup>f</sup> |
|---------|-------------|------------------------------------------------------------|---------------------------------------|----------------------------------|--------------------------------------|---------------------------------------|----------------------------------|--------------------------------------|
| 84978   | FRMD5       | FERM domain containing 5                                   | -2.06                                 | 2.20E-05                         | 8.04E-04                             | 1.64                                  | 7.60E-05                         | 4.51E-03                             |
| 23492   | CBX7        | chromobox homolog 7                                        | -2.05                                 | 1.99E-03                         | 1.32E-02                             | -1.71                                 | 6.80E-07                         | 4.69E-04                             |
| 27147   | DENND2A     | DENN/MADD domain containing 2A                             | -2.04                                 | 3.24E-03                         | 1.85E-02                             | 2.64                                  | 1.61E-05                         | 2.09E-03                             |
| 9212    | AURKB       | aurora kinase B                                            | -2.04                                 | 5.42E-04                         | 5.61E-03                             | -1.93                                 | 5.26E-06                         | 1.05E-03                             |
| 1075    | CTSC        | cathepsin C                                                | -2.04                                 | 1.20E-04                         | 2.12E-03                             | 1.70                                  | 3.35E-04                         | 1.02E-02                             |
| 29887   | SNX10       | sorting nexin 10                                           | -2.03                                 | 2.12E-04                         | 3.07E-03                             | -1.71                                 | 6.65E-07                         | 4.69E-04                             |
| 649970  | LOC649970   | similar to creatine kinase, mitochondrial 1B precursor     | -2.03                                 | 1.20E-06                         | 1.88E-04                             | -1.73                                 | 2.82E-06                         | 8.86E-04                             |
| 197021  | LCTL        | lactase-like                                               | -2.02                                 | 8.24E-06                         | 4.94E-04                             | 1.51                                  | 2.70E-04                         | 8.93E-03                             |
| 10063   | COX17       | COX17 cytochrome c oxidase assembly homolog                | -1.97<br>(-2.76)                      | 1.29E-03<br>(1.94E-03)           | 9.80E-03                             | -1.59<br>(-2.50)                      | 3.87E-04<br>(3.85E-03)           | 1.09E-02                             |
| 9929    | JOSD1       | Josephin domain containing 1                               | -1.94                                 | 1.62E-05                         | 6.89E-04                             | -1.86                                 | 2.17E-06                         | 8.86E-04                             |
| 306     | ANXA3       | annexin A3                                                 | -1.91                                 | 3.85E-05                         | 1.09E-03                             | 1.52                                  | 2.03E-06                         | 8.48E-04                             |
| 84953   | MICALCL     | MICAL C-terminal like                                      | -1.90                                 | 8.23E-04                         | 7.28E-03                             | -1.63                                 | 3.20E-05                         | 2.94E-03                             |
| 1854    | DUT         | dUTP pyrophosphatase                                       | -1.89                                 | 2.48E-04                         | 3.36E-03                             | -1.91                                 | 4.88E-07                         | 4.37E-04                             |
| 22995   | CEP152      | centrosomal protein 152kDa                                 | -1.88                                 | 6.56E-04                         | 6.33E-03                             | -1.61                                 | 4.04E-03                         | 4.20E-02                             |
| 8685    | MARCO       | macrophage receptor with collagenous structure             | -1.87                                 | 1.35E-03                         | 1.01E-02                             | -1.65                                 | 6.02E-04                         | 1.38E-02                             |
| 376267  | RAB15       | RAB15, member RAS oncogene family                          | -1.87                                 | 2.91E-05                         | 9.24E-04                             | -1.60                                 | 3.20E-03                         | 3.63E-02                             |
| 54471   | SMCR7L      | Smith-Magenis syndrome chromosome region, candidate 7-like | -1.87                                 | 2.81E-05                         | 9.15E-04                             | -1.53                                 | 2.99E-04                         | 9.41E-03                             |
| 56993   | TOMM22      | translocase of outer mitochondrial membrane 22             | -1.84                                 | 5.14E-04                         | 5.44E-03                             | -1.59                                 | 2.49E-05                         | 2.71E-03                             |
| 8195    | MKKS        | McKusick-Kaufman syndrome                                  | -1.84                                 | 7.18E-06                         | 4.68E-04                             | -1.97                                 | 2.35E-07                         | 3.01E-04                             |
| 23236   | PLCB1       | phospholipase C, beta 1 (phosphoinositide-specific)        | -1.83                                 | 4.65E-05                         | 1.24E-03                             | -1.58                                 | 1.94E-04                         | 7.52E-03                             |
| 6000    | RGS7        | regulator of G-protein signaling 7                         | -1.82                                 | 8.30E-05                         | 1.74E-03                             | 1.69                                  | 2.57E-03                         | 3.18E-02                             |
| 11019   | LIAS        | lipoic acid synthetase                                     | -1.80                                 | 6.40E-05                         | 1.50E-03                             | -1.65                                 | 6.82E-05                         | 4.28E-03                             |
| 26258   | PLDN        | pallidin homolog (mouse)                                   | -1.77                                 | 2.27E-04                         | 3.21E-03                             | -1.64                                 | 2.65E-04                         | 8.83E-03                             |
| 256586  | LYSMD2      | LysM, putative peptidoglycan-binding, domain containing 2  | -1.77                                 | 1.25E-03                         | 9.56E-03                             | -1.89                                 | 2.77E-05                         | 2.81E-03                             |
| 8536    | CAMK1       | calcium/calmodulin-dependent protein                       | -1.75                                 | 3.32E-03                         | 1.88E-02                             | -1.54                                 | 1.62E-04                         | 6.94E-03                             |

| Gene ID | Gene Symbol | Gene Description                                                    | PRC shRNA #1 fold change <sup>a</sup> | PRC shRNA#1 p-value <sup>b</sup> | PRC shRNA#1 FDR p-value <sup>c</sup> | PRC shRNA #4 fold change <sup>d</sup> | PRC shRNA#4 p-value <sup>e</sup> | PRC shRNA#4 FDR p-value <sup>f</sup> |
|---------|-------------|---------------------------------------------------------------------|---------------------------------------|----------------------------------|--------------------------------------|---------------------------------------|----------------------------------|--------------------------------------|
|         |             | kinase I                                                            |                                       |                                  |                                      |                                       |                                  |                                      |
| 132299  | OCIAD2      | OCIA domain containing 2                                            | -1.74                                 | 7.56E-03                         | 3.37E-02                             | 1.90                                  | 1.35E-05                         | 1.90E-03                             |
| 1809    | DPYSL3      | Dihydropyrimidinase-like 3                                          | -1.74                                 | 2.83E-03                         | 1.69E-02                             | -3.60                                 | 1.23E-07                         | 2.00E-04                             |
| 51087   | YBX2        | Y box binding protein 2                                             | -1.72                                 | 4.63E-03                         | 2.38E-02                             | -2.18                                 | 3.39E-08                         | 1.01E-04                             |
| 22837   | COBLL1      | COBL-like 1                                                         | -1.72                                 | 6.52E-04                         | 6.31E-03                             | -1.54                                 | 2.31E-03                         | 3.01E-02                             |
| 93273   | LEMD1       | LEM domain containing 1                                             | -1.71                                 | 9.65E-03                         | 4.00E-02                             | -1.50                                 | 7.18E-05                         | 4.37E-03                             |
| 5216    | PFN1        | profilin 1                                                          | -1.70                                 | 6.39E-05                         | 1.50E-03                             | -1.63                                 | 1.43E-04                         | 6.37E-03                             |
| 708     | C1QBP       | complement component 1, q subcomponent binding protein              | -1.69                                 | 3.60E-03                         | 1.99E-02                             | -1.71                                 | 1.03E-04                         | 5.32E-03                             |
| 460     | ASTN1       | astrotactin 1                                                       | -1.69                                 | 2.81E-05                         | 9.15E-04                             | -1.52                                 | 1.23E-05                         | 1.83E-03                             |
| 2944    | GSTM1       | glutathione S-transferase M1                                        | -1.66                                 | 3.45E-04                         | 4.18E-03                             | 1.80                                  | 1.04E-03                         | 1.89E-02                             |
| 10463   | SLC30A9     | solute carrier family 30 (zinc transporter), member 9               | -1.66                                 | 2.52E-05                         | 8.60E-04                             | -1.51                                 | 8.63E-05                         | 4.82E-03                             |
| 4927    | NUP88       | nucleoporin 88kDa                                                   | -1.65                                 | 7.85E-05                         | 1.69E-03                             | -1.70                                 | 1.87E-06                         | 8.35E-04                             |
| 79083   | MLPH        | melanophilin                                                        | -1.64                                 | 1.60E-03                         | 1.14E-02                             | -1.84                                 | 4.03E-06                         | 9.63E-04                             |
| 10762   | NUP50       | nucleoporin 50kDa                                                   | -1.63                                 | 2.49E-03                         | 1.54E-02                             | -1.90                                 | 3.23E-04                         | 9.91E-03                             |
| 11249   | NXPH2       | neurexophilin 2                                                     | -1.62                                 | 4.99E-04                         | 5.34E-03                             | -1.77                                 | 1.59E-05                         | 2.08E-03                             |
| 63979   | FIGNL1      | fidgetin-like 1                                                     | -1.62                                 | 8.82E-04                         | 7.58E-03                             | -1.67                                 | 3.41E-05                         | 2.98E-03                             |
| 9582    | APOBEC3B    | Apolipoprotein B mRNA editing enzyme, catalytic polypeptide-like 3B | -1.61                                 | 5.49E-03                         | 2.68E-02                             | -2.63                                 | 2.20E-07                         | 3.01E-04                             |
| 7139    | TNNT2       | troponin T type 2 (cardiac)                                         | -1.61                                 | 3.54E-03                         | 1.97E-02                             | 1.73                                  | 1.12E-03                         | 1.98E-02                             |
| 23466   | CBX6        | chromobox homolog 6                                                 | -1.58                                 | 5.39E-04                         | 5.60E-03                             | -1.73                                 | 2.91E-06                         | 8.86E-04                             |
| 174     | AFP         | alpha-fetoprotein                                                   | -1.55                                 | 1.15E-03                         | 9.02E-03                             | -1.79                                 | 2.29E-05                         | 2.54E-03                             |
| 9022    | CLIC3       | chloride intracellular channel 3                                    | -1.54                                 | 3.62E-03                         | 1.99E02                              | 1.74                                  | 4.92E-04                         | 1.24E-02                             |
| 84888   | SPPL2A      | signal peptide peptidase-like 2A                                    | -1.50                                 | 2.75E-04                         | 3.58E-03                             | -1.62                                 | 1.53E-05                         | 2.05E-03                             |
| 5986    | RFNG        | RFNG O-fucosylpeptide 3-beta-N-acetylglucosaminyltransferase        | 1.50                                  | 3.79E-03                         | 2.06E-02                             | 1.59                                  | 4.51E-06                         | 1.03E-03                             |
| 389860  | PAGE2B      | P antigen family, member 2B                                         | 1.50                                  | 2.45E-04                         | 3.34E-03                             | -1.91                                 | 9.62E-06                         | 1.57E-03                             |
| 4072    | TACSTD1     | Tumor-associated calcium signal transducer 1                        | 1.55                                  | 6.05E-04                         | 6.03E-03                             | 2.49                                  | 5.35E-08                         | 1.37E-04                             |
| 5217    | PFN2        | profilin 2                                                          | 1.56                                  | 3.63E-05                         | 1.05E-03                             | -1.57                                 | 2.49E-03                         | 3.14E-02                             |
| 29085   | PHPT1       | phosphohistidine phosphatase 1                                      | 1.56                                  | 1.20E-03                         | 9.29E-03                             | 1.57                                  | 1.17E-03                         | 2.04E-02                             |

| Gene ID | Gene Symbol | Gene Description                                       | PRC shRNA #1 fold change <sup>a</sup> | PRC shRNA#1 p-value <sup>b</sup> | PRC shRNA#1 FDR p-value <sup>c</sup> | PRC shRNA #4 fold change <sup>d</sup> | PRC shRNA#4 p-value <sup>e</sup> | PRC shRNA#4 FDR p-value <sup>f</sup> |
|---------|-------------|--------------------------------------------------------|---------------------------------------|----------------------------------|--------------------------------------|---------------------------------------|----------------------------------|--------------------------------------|
| 56675   | NRIP3       | nuclear receptor interacting protein 3                 | 1.59                                  | 1.86E-03                         | 1.26E-02                             | -1.57                                 | 8.45E-05                         | 4.77E-03                             |
| 79850   | FAM57A      | family with sequence similarity 57, member A           | 1.59                                  | 3.12E-04                         | 3.91E-03                             | 1.73                                  | 6.84E-07                         | 4.69E-04                             |
| 1508    | CTSB        | cathepsin B                                            | 1.61                                  | 8.44E-04                         | 7.40E-03                             | 2.08                                  | 5.80E-06                         | 1.12E-03                             |
| 205     | AK3L1       | adenylate kinase 3-like 1                              | 1.62                                  | 3.34E-04                         | 4.07E-03                             | -1.77                                 | 5.94E-05                         | 3.98E-03                             |
| 6238    | RRBP1       | ribosome binding protein 1 homolog 180kDa (dog)        | 1.62                                  | 6.82E-04                         | 6.47E-03                             | -2.38                                 | 6.68E-06                         | 1.21E-03                             |
| 51206   | GP6         | glycoprotein VI (platelet)                             | 1.63                                  | 9.59E-03                         | 3.99E-02                             | 1.78                                  | 3.94E-04                         | 1.10E-02                             |
| 140885  | SIRPA       | signal-regulatory protein alpha                        | 1.65                                  | 4.86E-05                         | 1.28E-03                             | 1.81                                  | 3.75E-04                         | 1.07E-02                             |
| 3799    | KIF5B       | kinesin family member 5B                               | 1.68                                  | 8.32E-05                         | 1.74E-02                             | -1.51                                 | 2.33E-03                         | 3.01E-02                             |
| 9772    | KIAA0195    | KIAA0195                                               | 1.70                                  | 6.95E-03                         | 3.17E-02                             | 1.55                                  | 2.54E-05                         | 2.72E-03                             |
| 7077    | TIMP2       | TIMP metalloproteinase inhibitor 2                     | 1.70                                  | 1.09E-03                         | 8.68E-03                             | 1.64                                  | 8.04E-05                         | 4.65E-03                             |
| 6453    | ITSN1       | intersectin 1 (SH3 domain protein)                     | 1.72                                  | 1.97E-03                         | 1.31E-02                             | 1.74                                  | 5.23E-04                         | 1.28E-02                             |
| 116225  | ZMYND19     | zinc finger, MYND-type containing 19                   | 1.73                                  | 6.08E-04                         | 6.05E-03                             | 1.50                                  | 2.86E-04                         | 9.19E-03                             |
| 55178   | RNMTL1      | RNA methyltransferase like 1                           | 1.73                                  | 1.21E-03                         | 9.35E-03                             | 1.50                                  | 1.18E-03                         | 2.04E-02                             |
| 64975   | MRPL41      | mitochondrial ribosomal protein L41                    | 1.74                                  | 2.79E-04                         | 3.61E-03                             | 1.73                                  | 2.27E-05                         | 2.54E-03                             |
| 65992   | C20orf116   | chromosome 20 open reading frame 116                   | 1.75                                  | 1.14E-05                         | 5.76E-04                             | 1.66                                  | 2.35E-05                         | 2.57E-03                             |
| 875     | CBS         | cystathionine-beta-synthase                            | 1.77                                  | 4.92E-04                         | 5.30E-03                             | -1.57                                 | 2.17E-05                         | 2.47E-03                             |
| 11253   | MAN1B1      | mannosidase, alpha, class 1B, member 1                 | 1.78                                  | 6.00E-04                         | 6.01E-03                             | 1.63                                  | 3.76E-04                         | 1.07E-02                             |
| 10439   | OLFM1       | olfactomedin 1                                         | 1.86                                  | 1.93E-05                         | 7.51E-04                             | -2.56                                 | 1.66E-06                         | 8.35E-04                             |
| 25      | ABL1        | v-abl Abelson murine leukemia viral oncogene homolog 1 | 1.89                                  | 3.44E-03                         | 1.93E-03                             | 1.72                                  | 7.49E-05                         | 4.47E-03                             |
| 92285   | ZNF585B     | zinc finger protein 585B                               | 1.89                                  | 3.12E-05                         | 9.75E-04                             | 1.63                                  | 2.89E-06                         | 8.87E-04                             |
| 50863   | HNT         | Neurotrimin                                            | 1.89                                  | 9.21E-03                         | 3.89E-02                             | 3.12                                  | 1.90E-05                         | 2.29E-03                             |
| 55684   | C9orf86     | chromosome 9 open reading frame 86                     | 1.89                                  | 5.34E-06                         | 4.09E-04                             | 1.57                                  | 9.45E-05                         | 5.00E-03                             |
| 5157    | PDGFRL      | Platelet-derived growth factor receptor-like           | 1.97                                  | 6.70E-04                         | 6.41E-03                             | 2.48                                  | 2.73E-05                         | 2.80E-03                             |
| 2889    | RAPGEF1     | Rap guanine nucleotide exchange factor (GEF) 1         | 2.01                                  | 2.18E-05                         | 8.03E-04                             | 1.60                                  | 3.61E-06                         | 8.99E-04                             |
| 7991    | TUSC3       | Tumor suppressor candidate 3                           | 2.02                                  | 7.42E-06                         | 4.74E-04                             | 2.66                                  | 3.84E-07                         | 3.93E-04                             |
| 221061  | C10orf38    | chromosome 10 open reading frame 38                    | 2.05                                  | 1.24E-05                         | 5.97E-04                             | 1.88                                  | 2.72E-04                         | 8.94E-03                             |
| 1398    | CRK         | v-crk sarcoma virus CT10 oncogene homolog (avian)      | 2.06                                  | 3.26E-06                         | 3.34E-04                             | 1.82                                  | 4.74E-06                         | 1.05E-03                             |

| Gene ID | Gene Symbol | Gene Description                                                                                    | PRC shRNA #1 fold change <sup>a</sup> | PRC shRNA#1 p-value <sup>b</sup> | PRC shRNA#1 FDR p-value <sup>c</sup> | PRC shRNA #4 fold change <sup>d</sup> | PRC shRNA#4 p-value <sup>e</sup> | PRC shRNA#4 FDR p-value <sup>f</sup> |
|---------|-------------|-----------------------------------------------------------------------------------------------------|---------------------------------------|----------------------------------|--------------------------------------|---------------------------------------|----------------------------------|--------------------------------------|
| 83700   | JAM3        | junctional adhesion molecule 3                                                                      | 2.07                                  | 7.78E-04                         | 7.03E-03                             | -1.99                                 | 1.06E-05                         | 1.67E-03                             |
| 6836    | SURF4       | surfeit 4                                                                                           | 2.09                                  | 8.80E-05                         | 1.79E-03                             | 1.54                                  | 5.66E-04                         | 1.34E-02                             |
| 285761  | DCBLD1      | discoidin, CUB and LCCL domain containing 1                                                         | 2.10                                  | 1.50E-05                         | 6.70E-04                             | 1.76                                  | 1.29E-05                         | 1.86E-03                             |
| 26012   | NELF        | nasal embryonic LHRH factor                                                                         | 2.12                                  | 1.75E-05                         | 7.19E-04                             | 1.61                                  | 3.41E-04                         | 1.02E-02                             |
| 84660   | CCDC62      | coiled-coil domain containing 62                                                                    | 2.16                                  | 9.59E-05                         | 1.89E-03                             | 1.59                                  | 5.15E-05                         | 3.64E-03                             |
| 50628   | GEMIN4      | gem (nuclear organelle) associated protein 4                                                        | 2.17                                  | 1.22E-04                         | 2.13E-03                             | 1.62                                  | 2.38E-06                         | 8.87E-04                             |
| 7531    | YWHAE       | tyrosine 3-monooxygenase/tryptophan 5-monooxygenase activation protein, epsilon polypeptide         | 2.20                                  | 7.97E-06                         | 4.87E-04                             | 1.63                                  | 6.18E-06                         | 1.17E-03                             |
| 55174   | INTS10      | Integrator complex subunit 10                                                                       | 2.22                                  | 4.76E-06                         | 4.09E-04                             | 2.22                                  | 7.05E-07                         | 4.69E-04                             |
| 51031   | GLOD4       | glyoxalase domain containing 4                                                                      | 2.29                                  | 8.59E-07                         | 1.50E-04                             | 1.70                                  | 1.72E-06                         | 8.35E-04                             |
| 5033    | P4HA1       | procollagen-proline, 2-oxoglutarate 4-dioxygenase (proline 4-hydroxylase), alpha polypeptide I      | 2.29                                  | 7.93E-05                         | 1.71E-03                             | 1.53                                  | 2.91E-03                         | 3.43E-02                             |
| 252969  | NEIL2       | Nei-like 2 (E. Coli)                                                                                | 2.30                                  | 2.26E-05                         | 8.11E-04                             | 2.05                                  | 3.66E-05                         | 3.05E-03                             |
| 2022    | ENG         | endoglin (Osler-Rendu-Weber syndrome 1)                                                             | 2.31                                  | 4.84E-03                         | 2.45E-02                             | 1.59                                  | 1.38E-06                         | 7.56E-04                             |
| 55326   | AGPAT5      | 1-acylglycerol-3-phosphate O-acyltransferase 5 (lysophosphatidic acid acyltransferase, epsilon)     | 2.34                                  | 1.46E-04                         | 2.40E-03                             | 1.70                                  | 2.77E-05                         | 2.81E-03                             |
| 29928   | TIMM22      | translocase of inner mitochondrial membrane 22 homolog (yeast)                                      | 2.34                                  | 8.19E-07                         | 1.47E-04                             | 1.55                                  | 1.70E-05                         | 2.14E-03                             |
| 29883   | CNOT7       | CCR4-NOT transcription complex, subunit 7                                                           | 2.35                                  | 1.50E-06                         | 2.26E-04                             | 2.49                                  | 1.03E-05                         | 1.65E-03                             |
| 2280    | FKBP1A      | FK506 binding protein 1A, 12kDa                                                                     | 2.50                                  | 7.68E-06                         | 4.84E-04                             | 1.77                                  | 2.84E-05                         | 2.82E-03                             |
| 23362   | PSD3        | Pleckstrin and Sec7 domain containing 3                                                             | 2.59                                  | 5.06E-06                         | 4.09E04                              | 2.45                                  | 2.16E-04                         | 7.92E-03                             |
|         |             |                                                                                                     | (2.63)                                | (4.87E-02)                       |                                      | (3.09)                                | (4.54E-02)                       |                                      |
| 871     | SERPINH1    | serpin peptidase inhibitor, clade H (heat shock protein 47), member 1, (collagen binding protein 1) | 2.60                                  | 2.20E-07                         | 5.92E-05                             | 1.84                                  | 1.45E-06                         | 7.68E-04                             |

| Gene ID | Gene Symbol | Gene Description                                 | PRC shRNA #1 fold change <sup>a</sup> | PRC shRNA#1 p-value <sup>b</sup> | PRC shRNA#1 FDR p-value <sup>c</sup> | PRC shRNA #4 fold change <sup>d</sup> | PRC shRNA#4 p-value <sup>e</sup> | PRC shRNA#4 FDR p-value <sup>f</sup> |
|---------|-------------|--------------------------------------------------|---------------------------------------|----------------------------------|--------------------------------------|---------------------------------------|----------------------------------|--------------------------------------|
| 2222    | FDFT1       | Farnesyl-diphosphate farnesyltransferase 1       | 2.61                                  | 2.02E-04                         | 2.98E-03                             | 2.64                                  | 3.15E-06                         | 8.86E-04                             |
| 5108    | PCM1        | Pericentriolar material 1                        | 2.67<br>(2.02)                        | 4.00E-07<br>(2.85E-06)           | 8.62E-05                             | 2.49<br>(3.55)                        | 9.28E-05<br>(5.45E-02)           | 4.99E-03                             |
| 29      | ABR         | active BCR-related gene                          | 2.68                                  | 1.43E-05                         | 6.52E-04                             | 1.83                                  | 5.44E-06                         | 1.07E-03                             |
| 9639    | ARHGEF10    | Rho guanine nucleotide exchange factor (GEF) 10  | 2.90                                  | 5.32E-08                         | 2.36E-05                             | 1.86                                  | 2.63E-06                         | 8.87E-04                             |
| 8076    | MFAP5       | microfibrillar associated protein 5              | 2.95                                  | 2.48E-06                         | 2.87E-04                             | -1.57                                 | 4.61E-05                         | 3.46E-03                             |
| 56952   | PRTFDC1     | phosphoribosyl transferase domain containing 1   | 3.05                                  | 3.95E-06                         | 3.61E-04                             | -1.73                                 | 1.91E-06                         | 8.35E-04                             |
| 1404    | HAPLN1      | hyaluronan and proteoglycan link protein 1       | 3.38                                  | 3.84E-03                         | 2.08E-02                             | 1.75                                  | 7.62E-05                         | 4.51E-03                             |
| 2151    | F2RL2       | Coagulation factor II (thrombin) receptor-like 2 | 4.59                                  | 5.45E-05                         | 1.39E-03                             | 2.08                                  | 6.60E-05                         | 4.19E-03                             |
| 284406  | ZNF545      | Zinc finger protein 545                          | 4.80                                  | 3.42E-09                         | 6.30E-06                             | 2.74                                  | 7.85E-08                         | 1.57E-04                             |
| 51316   | PLAC8       | Placenta-specific 8                              | 17.78<br>(17.85)                      | 4.11E-05<br>(8.56E-04)           | 1.15E-03                             | 5.74<br>(7.36)                        | 1.65E-07<br>(3.81E-04)           | 2.47E-04                             |

<sup>a</sup>Mean fold changes in mRNA levels for a subset of genes whose expression is altered in both shRNA #1 and #4 transductants as assessed by Illumina microarray. Values are for those genes whose expression was significantly up or down regulated ( $p < 0.01$ , FDR  $p < 0.05$ ) by at least 1.5-fold in response to shRNA#1-mediated silencing of PRC in U2OS cells relative to a negative control shRNA.

<sup>b</sup>Corresponding p-values of gene expression changes in <sup>a</sup>

<sup>c</sup>Corresponding FDR adjusted p-values of gene expression changes in <sup>a</sup>

<sup>d</sup>Mean fold changes in mRNA levels for a subset of genes whose expression is altered in both shRNA #1 and #4 transductants as assessed by Illumina microarray. Values are for those genes whose expression was significantly up or down regulated ( $p < 0.01$ , FDR  $p < 0.05$ ) by at least 1.5-fold in response to shRNA#4-mediated silencing of PRC in U2OS cells relative to a negative control shRNA.

<sup>e</sup>Corresponding p-values of gene expression changes in <sup>d</sup>

<sup>f</sup>Corresponding FDR adjusted p-values of gene expression changes in <sup>d</sup>

<sup>§</sup>Numbers in parentheses are derived from the independent validation of gene expression as determined by quantitative real time RT-PCR for seven different genes. Values represent the average fold changes in mRNA expression for three separate determinations along with the corresponding p-values for PRC shRNA#1- or PRC shRNA#4-expressing cells relative to control shRNA-expressing cells.



**Supplemental Table S2. Effects of PRC silencing by shRNAs #1 or #4 on the expression of mitochondrion-related genes in U2OS cells.**

| Gene ID                                          | Gene symbol | Gene description                                      | PRC shRNA #1 fold change <sup>a</sup> | PRC shRNA#1 p-value <sup>b</sup> | PRC shRNA#1 FDR p-value <sup>c</sup> | PRC shRNA #4 fold change <sup>d</sup> | PRC shRNA#4 p-value <sup>e</sup> | PRC shRNA#4 FDR p-value <sup>f</sup> |
|--------------------------------------------------|-------------|-------------------------------------------------------|---------------------------------------|----------------------------------|--------------------------------------|---------------------------------------|----------------------------------|--------------------------------------|
| <b>Mitochondrial respiratory chain</b>           |             |                                                       |                                       |                                  |                                      |                                       |                                  |                                      |
| 4726                                             | NDUFS6      | NADH dehydrogenase (ubiquinone) Fe-S protein 6        | -1.29                                 | 2.71E-03                         | 1.63E-02                             |                                       |                                  |                                      |
| 374291                                           | NDUFS7      | NADH dehydrogenase (ubiquinone) Fe-S protein 7        | -1.38                                 | 3.60E-03                         | 1.99E-02                             |                                       |                                  |                                      |
| 51103                                            | NDUFAF1     | NADH dehydrogenase (ubiquinone) 1 alpha subcomplex    | -1.40                                 | 1.85E-03                         | 1.26E-02                             |                                       |                                  |                                      |
| 4729                                             | NDUFV2      | NADH dehydrogenase (ubiquinone) flavoprotein 2        | -1.51                                 | 3.80E-04                         | 4.47E-03                             | -1.25                                 | 8.11E-04                         | 1.64E-02                             |
| 4696                                             | NDUFA3      | NADH dehydrogenase (ubiquinone) 1 alpha subcomplex    | -1.64                                 | 1.18E-04                         | 2.10E-03                             |                                       |                                  |                                      |
| 4701                                             | NDUFA7      | NADH dehydrogenase (ubiquinone) 1 alpha subcomplex, 7 | -1.76                                 | 7.99E-06                         | 4.87E-04                             |                                       |                                  |                                      |
| 6389                                             | SDHA        | succinate dehydrogenase complex, subunit A            | -2.45                                 | 3.60E-05                         | 1.05E-03                             | -1.31                                 | 4.04E-04                         | 1.11E-02                             |
| 517                                              | ATP5G2      | ATP synthase, H+ transporting, mitochondrial F0 C2    | -1.43                                 | 7.32E-04                         | 6.77E-03                             |                                       |                                  |                                      |
| 9551                                             | ATP5J2      | ATP synthase, H+ transporting, mitochondrial F0 F2    | -2.01                                 | 4.40E-06                         | 3.83E-04                             |                                       |                                  |                                      |
| 2110                                             | ETFDH       | electron-transferring-flavoprotein dehydrogenase      | -1.48                                 | 3.96E-03                         | 2.13E-02                             |                                       |                                  |                                      |
| 80777                                            | CYB5B       | cytochrome b5 type B (outer mitochondrial membrane)   | -1.38                                 | 2.25E-04                         | 3.20E-03                             |                                       |                                  |                                      |
| <b>Mitochondrial protein import and assembly</b> |             |                                                       |                                       |                                  |                                      |                                       |                                  |                                      |
| 1352                                             | COX10       | COX10 homolog, cytochrome c oxidase assembly protein  | -1.35                                 | 2.55E-03                         | 1.57E-02                             | -1.30                                 | 1.85E-04                         | 7.38E-03                             |
| 1355                                             | COX15       | COX15 homolog, cytochrome c oxidase assembly protein  | -1.19                                 | 9.61E-03                         | 4.00E-02                             |                                       |                                  |                                      |
| 10063                                            | COX17       | COX17 cytochrome c oxidase assembly homolog           | -1.97                                 | 1.29E-03                         | 9.80E-03                             | -1.59                                 | 3.87E-04                         | 1.09E-02                             |
| 90639                                            | COX19       | COX19 cytochrome c oxidase assembly                   | -1.59                                 | 1.36E-04                         | 2.30E-03                             |                                       |                                  |                                      |

| Gene ID                          | Gene symbol | Gene description                                           | PRC shRNA #1 fold change <sup>a</sup> | PRC shRNA#1 p-value <sup>b</sup> | PRC shRNA#1 FDR p-value <sup>c</sup> | PRC shRNA #4 fold change <sup>d</sup> | PRC shRNA#4 p-value <sup>e</sup> | PRC shRNA#4 FDR p-value <sup>f</sup> |
|----------------------------------|-------------|------------------------------------------------------------|---------------------------------------|----------------------------------|--------------------------------------|---------------------------------------|----------------------------------|--------------------------------------|
| 55245                            | UQCC        | homolog ubiquinol-cytochrome c reductase complex chaperone | -1.57                                 | 2.44E-03                         | 1.52E-02                             |                                       |                                  |                                      |
| 5188                             | PET112L     | PET112-like (yeast)                                        | -2.17                                 | 2.26E-06                         | 2.79E-04                             |                                       |                                  |                                      |
| 6341                             | SCO1        | SCO cytochrome oxidase deficient homolog 1 (yeast)         | -1.67                                 | 3.18E-05                         | 9.77E-04                             | -1.45                                 | 2.35E-05                         | 2.57E-03                             |
| 10431                            | TIMM23      | translocase of inner mitochondrial membrane 23             | -1.34                                 | 1.22E-03                         | 9.36E-03                             | -1.21                                 | 1.88E-03                         | 2.67E-02                             |
| 54543                            | TOMM7       | translocase of outer mitochondrial membrane 7              | -1.25                                 | 1.02E-02                         | 4.18E-02                             |                                       |                                  |                                      |
| 9804                             | TOMM20      | translocase of outer mitochondrial membrane 20             | -1.57                                 | 2.61E-05                         | 8.76E-03                             |                                       |                                  |                                      |
| 56993                            | TOMM22      | translocase of outer mitochondrial membrane 22             | -1.84                                 | 5.14E-04                         | 5.44E-03                             | -1.59                                 | 2.49E-05                         | 2.71E-03                             |
| 9868                             | TOMM70A     | translocase of outer mitochondrial membrane 70             | -1.48                                 | 4.97E-04                         | 5.33E-03                             |                                       |                                  |                                      |
| 9512                             | PMPCB       | peptidase (mitochondrial processing) beta                  | -2.16                                 | 1.72E-05                         | 7.11E-04                             |                                       |                                  |                                      |
| <b>Mitochondrial translation</b> |             |                                                            |                                       |                                  |                                      |                                       |                                  |                                      |
| 55052                            | MRPL20      | mitochondrial ribosomal protein L20                        | -1.50                                 | 1.02E-04                         | 1.94E-03                             |                                       |                                  |                                      |
| 10573                            | MRPL28      | mitochondrial ribosomal protein L28                        | -1.45                                 | 2.87E-04                         | 3.68E-03                             |                                       |                                  |                                      |
| 9553                             | MRPL33      | mitochondrial ribosomal protein L33                        | -1.94                                 | 4.57E-05                         | 1.24E-03                             | -1.19                                 | 3.63E-03                         | 3.93E-02                             |
| 64979                            | MRPL36      | mitochondrial ribosomal protein L36                        | -1.64                                 | 4.33E-05                         | 1.19E-03                             |                                       |                                  |                                      |
| 64976                            | MRPL40      | mitochondrial ribosomal protein L40                        | -1.45                                 | 9.07E-04                         | 7.71E-03                             |                                       |                                  |                                      |
| 116540                           | MRPL53      | mitochondrial ribosomal protein L53                        | -1.83                                 | 9.28E-06                         | 5.30E-04                             |                                       |                                  |                                      |
| 128308                           | MRPL55      | mitochondrial ribosomal protein L55                        | -1.79                                 | 4.95E-05                         | 1.30E-03                             |                                       |                                  |                                      |
| 64951                            | MRPS24      | mitochondrial ribosomal protein S24                        | -1.56                                 | 7.69E-04                         | 7.00E-03                             |                                       |                                  |                                      |
| 65993                            | MRPS34      | mitochondrial ribosomal protein S34                        | -1.30                                 | 8.54E-03                         | 3.70E-02                             |                                       |                                  |                                      |
| 55157                            | DARS2       | aspartyl-tRNA synthetase 2, mitochondrial                  | -2.02                                 | 5.48E-05                         | 1.39E-03                             |                                       |                                  |                                      |
| 79587                            | CARS2       | cysteinyl-tRNA synthetase 2, mitochondrial (putative)      | -1.37                                 | 1.83E-04                         | 2.82E-03                             |                                       |                                  |                                      |
| 55699                            | IARS2       | isoleucyl-tRNA synthetase 2, mitochondrial                 | -1.66                                 | 7.29E-05                         | 1.61E-03                             |                                       |                                  |                                      |
| 10102                            | TSFM        | Ts translation elongation factor, mitochondrial            | -1.72                                 | 8.22E-05                         | 1.73E-03                             |                                       |                                  |                                      |

<sup>a</sup>Mean fold reduction in mRNA expression assessed by Illumina microarray of genes required for mitochondrial respiratory function including respiratory chain subunits, mitochondrial protein import and assembly factors, and components of the mitochondrial translation machinery. Values are for those genes that were significantly down regulated ( $p < 0.01$ , FDR  $p < 0.05$ ) in response to shRNA#1-mediated silencing of PRC in U2OS cells relative to a negative control shRNA.

<sup>b</sup>Corresponding p-values for gene expression changes in <sup>a</sup>

<sup>c</sup>Corresponding FDR adjusted p-values for gene expression changes in <sup>a</sup>

<sup>d</sup>Mean fold reduction in mRNA expression assessed by Illumina microarray of genes required for mitochondrial respiratory function including respiratory chain subunits, mitochondrial protein import and assembly factors, and components of the mitochondrial translation machinery. Values are for those genes that were significantly down regulated ( $p < 0.01$ , FDR  $p < 0.05$ ) in response to shRNA#4-mediated silencing of PRC in U2OS cells relative to a negative control shRNA.

<sup>e</sup>Corresponding p-values for gene expression changes in <sup>d</sup>

<sup>f</sup>Corresponding FDR adjusted p-values for gene expression changes in <sup>d</sup>

**Supplemental Table S3. Effects of PRC silencing by shRNAs #1 or #4 on the expression of histone genes in U2OS cells.**

| Gene ID | Gene Symbol | Gene Description             | PRC<br>shRNA#1<br>fold<br>change <sup>a</sup> | PRC<br>shRNA#1<br>p-value <sup>b</sup> | PRC<br>shRNA#1<br>FDR p-<br>value <sup>c</sup> | PRC<br>shRNA#4<br>fold<br>change <sup>d</sup> | PRC<br>shRNA#4<br>p-value <sup>e</sup> | PRC<br>shRNA#4<br>FDR p-<br>value <sup>f</sup> |
|---------|-------------|------------------------------|-----------------------------------------------|----------------------------------------|------------------------------------------------|-----------------------------------------------|----------------------------------------|------------------------------------------------|
| 8337    | HIST2H2AA3  | Histone cluster 2, H2aa3     | -45.58                                        | 5.02E-10                               | 2.87E-06                                       | -2.88                                         | 2.90E-07                               | 3.47E-04                                       |
| 8365    | HIST1H4H    | Histone cluster 1, H4h       | -45.53                                        | 5.83E-11                               | 8.79E-07                                       | -3.92                                         | 9.96E-08                               | 1.79E-04                                       |
| 8364    | HIST1H4C    | histone cluster 1, H4c       | -26.20                                        | 1.94E-07                               | 5.52E-05                                       |                                               |                                        |                                                |
| 8334    | HIST1H2AC   | Histone cluster 1, H2ac      | -26.11                                        | 1.25E-09                               | 3.46E-06                                       | -3.21                                         | 2.96E-06                               | 8.86E-04                                       |
| 8349    | HIST2H2BE   | Histone cluster 2, H2be      | -18.95                                        | 5.32E-08                               | 2.36E-05                                       | -3.15                                         | 3.24E-05                               | 2.94E-03                                       |
| 3006    | HIST1H1C    | histone cluster 1, H1c       | -15.45                                        | 8.33E-09                               | 1.07E-05                                       | -1.87                                         | 2.28E-05                               | 2.54E-03                                       |
| 8970    | HIST1H2BJ   | Histone cluster 1, H2bj      | -14.28                                        | 2.57E-09                               | 5.53E-06                                       | -3.35                                         | 1.90E-06                               | 8.35E-04                                       |
| 8370    | HIST2H4A    | histone cluster 2, H4a       | -12.95                                        | 6.55E-07                               | 1.23E-04                                       |                                               |                                        |                                                |
| 54145   | H2BFS       | H2B histone family, member S | -12.69                                        | 1.38E-09                               | 3.46E-06                                       |                                               |                                        |                                                |
| 8338    | HIST2H2AC   | Histone cluster 2, H2ac      | -11.46                                        | 1.69E-08                               | 1.21E-05                                       | -2.37                                         | 4.32E-06                               | 1.01E-03                                       |
| 3017    | HIST1H2BD   | histone cluster 1, H2bd      | -9.90                                         | 9.20E-09                               | 1.07E-05                                       | -1.65                                         | 4.29E-04                               | 1.15E-02                                       |
| 8344    | HIST1H2BE   | Histone cluster 1, H2be      | -8.63                                         | 1.58E-07                               | 4.87E-05                                       | -2.17                                         | 3.62E-05                               | 3.03E-03                                       |
| 8347    | HIST1H2BC   | Histone cluster 1, H2bc      | -8.12                                         | 2.83E-07                               | 6.65E-05                                       | -2.25                                         | 7.70E-06                               | 1.37E-03                                       |
| 55766   | H2AFJ       | H2A histone family, member J | -7.67                                         | 1.29E-07                               | 4.14E-05                                       | -2.37                                         | 3.71E-06                               | 9.01E-04                                       |
| 8367    | HIST1H4E    | Histone cluster 1, H4e       | -5.79                                         | 1.07E-08                               | 1.12E-05                                       | -2.38                                         | 8.76E-07                               | 5.42E-04                                       |
| 8351    | HIST1H3D    | histone cluster 1, H3d       | -4.40                                         | 9.51E-07                               | 1.62E-04                                       | -1.86                                         | 5.36E-07                               | 4.37E-04                                       |
| 8362    | HIST1H4K    | histone cluster 1, H4k       | -3.01                                         | 6.70E-07                               | 1.25E-04                                       | -1.21                                         | 3.43E-04                               | 1.02E-02                                       |
| 8357    | HIST1H3H    | histone cluster 1, H3h       | -2.68                                         | 3.56E-06                               | 3.51E-04                                       | -1.73                                         | 8.36E-05                               | 4.75E-03                                       |
| 8353    | HIST1H3E    | histone cluster 1, H3e       | -2.26                                         | 3.44E-05                               | 1.03E-03                                       | -1.36                                         | 4.25E-05                               | 3.30E-03                                       |
| 8969    | HIST1H2AG   | histone cluster 1, H2ag      | -2.12                                         | 4.03E-05                               | 1.13E-03                                       | -1.43                                         | 3.82E-04                               | 1.08E-02                                       |
| 317772  | HIST2H2AB   | histone cluster 2, H2ab      | -2.01                                         | 6.60E-06                               | 4.60E-04                                       | -1.43                                         | 3.47E-05                               | 3.01E-03                                       |
| 85236   | HIST1H2BK   | histone cluster 1, H2bk      | -1.99                                         | 2.28E-05                               | 8.14E-04                                       | -1.24                                         | 2.11E-04                               | 7.81E-03                                       |
| 8350    | HIST1H3A    | histone cluster 1, H3a       | -1.79                                         | 9.51E-06                               | 5.32E-04                                       | -1.20                                         | 3.62E-03                               | 3.93E-02                                       |
| 3013    | HIST1H2AD   | histone cluster 1, H2ad      | -1.77                                         | 6.62E-05                               | 1.52E-03                                       | -1.48                                         | 7.12E-04                               | 1.54E-02                                       |
| 8335    | HIST1H2AB   | histone cluster 1, H2ab      | -1.75                                         | 4.25E-06                               | 3.76E-04                                       |                                               |                                        |                                                |
| 8343    | HIST1H2BF   | histone cluster 1, H2bf      | -1.73                                         | 5.98E-05                               | 1.45E-03                                       | -1.18                                         | 3.71E-03                               | 3.97E-02                                       |
| 8968    | HIST1H3F    | histone cluster 1, H3f       | -1.57                                         | 3.90E-04                               | 4.53E-03                                       | -1.31                                         | 9.19E-05                               | 4.98E-03                                       |
| 9555    | H2AFY       | H2A histone family, member Y | -1.41                                         | 1.95E-04                               | 2.92E-03                                       |                                               |                                        |                                                |
| 126961  | HIST2H3C    | histone cluster 2, H3c       | -1.40                                         | 6.70E-04                               | 6.41E-03                                       | -1.26                                         | 7.42E-04                               | 1.57E-02                                       |
| 8366    | HIST1H4B    | histone cluster 1, H4b       | -1.34                                         | 3.93E-04                               | 4.56E-03                                       | -1.16                                         | 4.37E-03                               | 4.41E-02                                       |

| Gene ID | Gene Symbol | Gene Description             | PRC<br>shRNA#1<br>fold<br>change <sup>a</sup> | PRC<br>shRNA#1<br>p-value <sup>b</sup> | PRC<br>shRNA#1<br>FDR p-<br>value <sup>c</sup> | PRC<br>shRNA#4<br>fold<br>change <sup>d</sup> | PRC<br>shRNA#4<br>p-value <sup>e</sup> | PRC<br>shRNA#4<br>FDR p-<br>value <sup>f</sup> |
|---------|-------------|------------------------------|-----------------------------------------------|----------------------------------------|------------------------------------------------|-----------------------------------------------|----------------------------------------|------------------------------------------------|
| 8358    | HIST1H3B    | histone cluster 1, H3b       | -1.33                                         | 1.24E-03                               | 9.52E-03                                       |                                               |                                        |                                                |
| 8345    | HIST1H2BH   | histone cluster 1, H2bh      | -1.28                                         | 8.54E-04                               | 7.42E-03                                       |                                               |                                        |                                                |
| 8341    | HIST1H2BN   | histone cluster 1, H2bn      | -1.26                                         | 3.01E-03                               | 1.75E-02                                       |                                               |                                        |                                                |
| 8339    | HIST1H2BG   | histone cluster 1, H2bg      | -1.23                                         | 2.09E-03                               | 1.36E-02                                       | -1.15                                         | 4.18E-03                               | 4.30E-02                                       |
| 8360    | HIST1H4D    | histone cluster 1, H4d       | -1.23                                         | 2.97E-03                               | 1.74E-02                                       |                                               |                                        |                                                |
| 554313  | HIST2H4B    | histone cluster 2, H4b       |                                               |                                        |                                                | -2.60                                         | 4.65E-06                               | 1.04E-03                                       |
| 3024    | HIST1H1A    | histone cluster 1, H1a       |                                               |                                        |                                                | -1.34                                         | 1.20E-03                               | 2.05E-02                                       |
| 3015    | H2AFZ       | H2A histone family, member Z |                                               |                                        |                                                | -1.22                                         | 4.43E-04                               | 1.16E-02                                       |

<sup>a</sup>Mean fold reduction in expression assessed by Illumina microarray of histone gene transcripts. Values are for those genes that were significantly down regulated ( $p < 0.01$ , FDR  $p < 0.05$ ) in response to shRNA#1-mediated silencing of PRC in U2OS cells relative to a negative control shRNA.

<sup>b</sup>Corresponding p-values of gene expression changes in <sup>a</sup>

<sup>c</sup>Corresponding FDR adjusted p-values of gene expression changes in <sup>a</sup>

<sup>d</sup>Mean fold reduction in expression assessed by Illumina microarray of histone gene transcripts. Values are for those genes that were significantly down regulated ( $p < 0.01$ , FDR  $p < 0.05$ ) in response to shRNA#4-mediated silencing of PRC in U2OS cells relative to a negative control shRNA.

<sup>e</sup>Corresponding p-values for gene expression changes in <sup>d</sup>

<sup>f</sup>Corresponding FDR adjusted p-values for gene expression changes in <sup>d</sup>
